# Supplementary material for: Anti-tumor Drug THZ1 Suppresses TGFβ2-mediated EMT in Lens Epithelial Cells via Notch and TGFβ/Smad Signaling Pathway
Source: PubMed Central journal article supplement — J Cancer. 2019 Jun 9;10(16):3778–88. doi: 10.7150/jca.30359 (PMC6636287; doi:10.7150/jca.30359), 2019-06-09

**Table S1: List of primers used for gene expression analysis**

| <b>Gene</b>                  | <b>Sequences</b>        |                             |
|------------------------------|-------------------------|-----------------------------|
| <b>Homo sapiens</b>          | <b>Forward</b>          | <b>Reverse</b>              |
| CDK1                         | CCCTTTAGCGCGGATCTACC    | TGGCTACCACTTGACCTGTAG       |
| Cyclin B1                    | CGGCCTCTACCTTTGCACTT    | TTCTTGACAGTCCATTCACCA       |
| Collagen IV                  | GCCCATGGTCAGGACTTG      | AAGGGCATGGTGCTGAACT         |
| Fibronectin                  | CGAGCTTCCCCAACTGGTAACCC | AGCTTCTTGTCTACATTCCGGCGG    |
| N-cadherin                   | GGACAGTTCCTGAGGGATCA    | GGATTGCCTTCCATGTCTGT        |
| Snail1                       | TCTAGGCCCTGGCTGCTACAA   | ACATCTGAGTGGGTCTGGAGGTG     |
| $\alpha$ -SMA                | CCGACCGAATGCAGAAGGA     | ACAGAGTATTTGCGCTCCGAA       |
| ZEB1                         | GCCAACAGACCAGACAGTGT    | GCCCTTCCTTTCTGTGTCA         |
| Notch1                       | GATGACCTGGGCAAGTCCG     | TGCGCTCCTGTGCGATGT          |
| Notch2                       | GGGACCCTGTCATACCCTCT    | GAGCCATGCTTACGCTTTTCG       |
| Notch3                       | TGTGAACTCCTCTCCCCCTG    | CGTTCAGGCATGGGTCTTG         |
| MAML1                        | GCCACGCATCTTCATGATACAG  | CCATTGGAAGAGATGGCAACTC      |
| RBPJ                         | CAGTGCTGGATCTGGGAATCTCT | CTCACCAAATTTCCCAGGCGATG     |
| Hes1                         | ACACGACACCGGATAAACCAA   | AATGCCGCGAGCTATCTTTCT       |
| GAPDH                        | CCCGCTTCGCTCTCTGCTCC    | ACCAGGCGCCAATACGACC         |
| <b>Oryctolagus cuniculus</b> | <b>Forward</b>          | <b>Reverse</b>              |
| Collagen I                   | CATTAGGGGACACAACGGTC    | GGACCAACACTGCCATCACT        |
| Fibronectin                  | CTCACCCGAGGCGCCACCTA    | TCGCTC CCA CTC CTC TCC AACG |
| Snail2                       | AGAACTCACACTGGGGAGAAGC  | TTTGTCATTTGGCGTCGGAG        |
| GAPDH                        | TCGGAGTGAACGGATTTGGC    | TTCCCGTTCTCAGCCTTGAC        |
| <b>Rattus norvegicus</b>     | <b>Forward</b>          | <b>Reverse</b>              |
| Fibronectin                  | AAGACAGATGAGCTTCCCCAAC  | TGGGTTGTTGGTGGGATGTG        |
| Snail1                       | GACGCGTGTGTGGAGTTCA     | AGATGAGGGTGGGCAGCGAA        |
| ZEB1                         | GGAAGGCAGAGAATGGGATGT   | GGCCTCTTACCTGTATGCTCAT      |
| ZO-1                         | GAGAAAGGTGAAACTCTGCTG   | ACAGTGTGGCAAGCGTA           |
| GAPDH                        | AGTGCCAGCCTCGTCTCATA    | CTTGCCGTGGGTAGAGTCAT        |

**Table S2: List of primary antibody used for Wb and Immunofluorescence**

| <b>Primary Antibody</b>        | <b>Company</b>                                      | <b>Cat.</b>       | <b>Lot.</b>        |
|--------------------------------|-----------------------------------------------------|-------------------|--------------------|
| <b>p-ERK1/2</b>                | <b>Cell Signaling Technology, Danvers, MA</b>       | <b>#9101S</b>     | <b>28</b>          |
| <b><math>\alpha</math>-SMA</b> | <b>Cell Signaling Technology, Danvers, MA</b>       | <b>#48938</b>     | <b>1</b>           |
| <b>p-AKT</b>                   | <b>Cell Signaling Technology, Danvers, MA</b>       | <b>#4058S</b>     | <b>30</b>          |
| <b>Notch 1</b>                 | <b>Cell Signaling Technology, Danvers, MA</b>       | <b>#2421S</b>     | <b>16</b>          |
| <b>Notch 2</b>                 | <b>Cell Signaling Technology, Danvers, MA</b>       | <b>#5732S</b>     | <b>2</b>           |
| <b>GAPDH</b>                   | <b>Cell Signaling Technology, Danvers, MA</b>       | <b>#517S</b>      | <b>4</b>           |
| <b>Smad2/3</b>                 | <b>Santa Cruz, Santa Cruz Biotechnology Inc, CA</b> | <b>sc-8332</b>    | <b>G3115</b>       |
| <b>p-Smad2/3</b>               | <b>Santa Cruz, Santa Cruz Biotechnology Inc, CA</b> | <b>sc-11769-R</b> | <b>H1215</b>       |
| <b>AKT</b>                     | <b>Santa Cruz, Santa Cruz Biotechnology Inc, CA</b> | <b>sc-1618</b>    | <b>H1415</b>       |
| <b>p-38</b>                    | <b>Santa Cruz, Santa Cruz Biotechnology Inc, CA</b> | <b>sc-7149</b>    | <b>H0213</b>       |
| <b>Tubulin</b>                 | <b>Bioworld Technology, Inc, US</b>                 | <b>AP0064</b>     | <b>AA0217J1909</b> |
| <b>E-cadherin</b>              | <b>Beijing Biosynthesis Biotechnology Co,LTD</b>    | <b>bs-10009R</b>  | <b>AG07255180</b>  |
| <b>N-cadherin</b>              | <b>Beijing Biosynthesis Biotechnology Co,LTD</b>    | <b>bs1172R</b>    | <b>AG08057588</b>  |
| <b>p-P38</b>                   | <b>Beijing Biosynthesis Biotechnology Co,LTD</b>    | <b>sc101759</b>   | <b>H0213</b>       |
| <b>ERK</b>                     | <b>Beijing Biosynthesis Biotechnology Co,LTD</b>    | <b>bsm-3337M</b>  | <b>AGD7125402</b>  |
| <b>CDC25</b>                   | <b>Boster, CN</b>                                   | <b>BM2728</b>     | <b>1F12</b>        |
| <b>Cyclin B1</b>               | <b>Boster, CN</b>                                   | <b>BM0766</b>     | <b>1B10</b>        |
| <b>CDK1</b>                    | <b>Boster, CN</b>                                   | <b>BM1028</b>     | <b>8C5A6</b>       |
| <b>Fibronectin</b>             | <b>Boster, CN</b>                                   | <b>BA1771</b>     | <b>Y-07D10A</b>    |
| <b>ZO-1</b>                    | <b>Boster, CN</b>                                   | <b>PB0231</b>     | <b>ZP1007BP07</b>  |
| <b>PI3K</b>                    | <b>Boster, CN</b>                                   | <b>BM5187</b>     | <b>BST17155187</b> |

**Figure S1 : STR profiling of our lens epithelial cell line used above.**

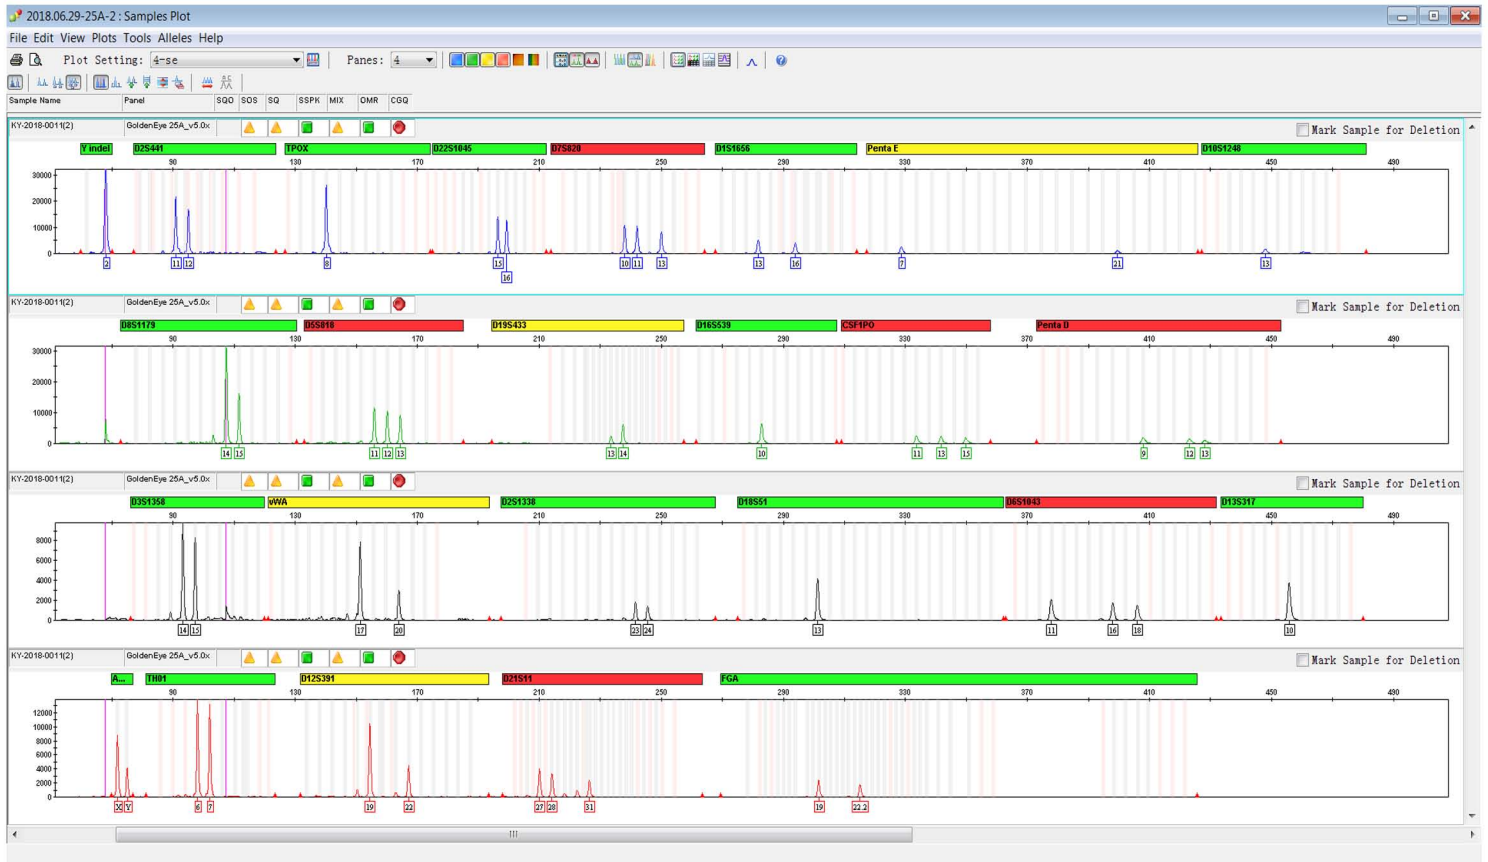

**Result of STR matching analysis by your data.**

- DSMZ Profile Database -

A graphical presentation is shown at the bottom of this page.

| EV          | Cell No. | Cell name                | Locus names |         |          |         |       |      |     |      |          | Figures |
|-------------|----------|--------------------------|-------------|---------|----------|---------|-------|------|-----|------|----------|---------|
|             |          |                          | D5S818      | D13S317 | D7S820   | D16S539 | VWA   | TH01 | AM  | TPOX | CSF1PO   |         |
|             |          | <i>Query (Your Cell)</i> | 1,12,13     | 10      | 10,11,13 | 10      | 17,20 | 6,7  | x,y | 8    | 11,13,15 |         |
| 0.92(36/39) | RCB1591  | SRA 01/04                | 1,12,13     | 10,10   | 10,11,13 | 10,10   | 17,20 | 6,7  | X,Y | 8,8  | 11,13,15 | -       |

**Figure S2: THZ1 induced apoptosis and TGF $\beta$ 2 induced EMT in LECs.**

**A**

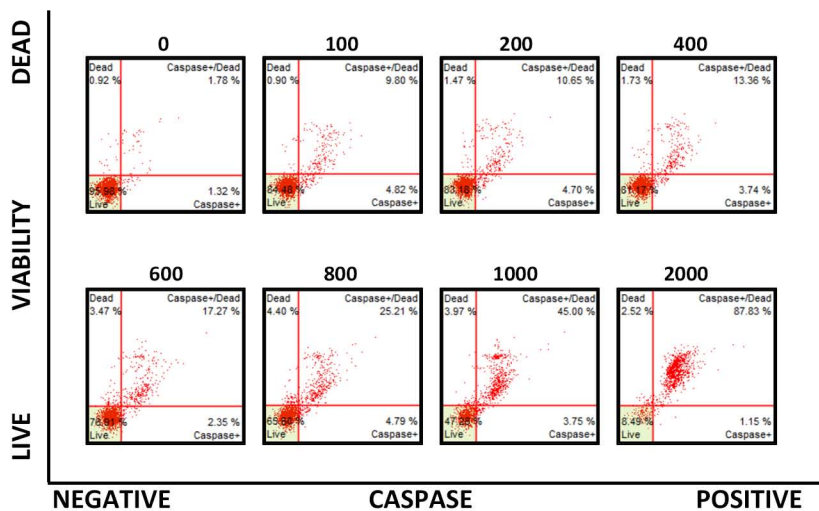

**B**

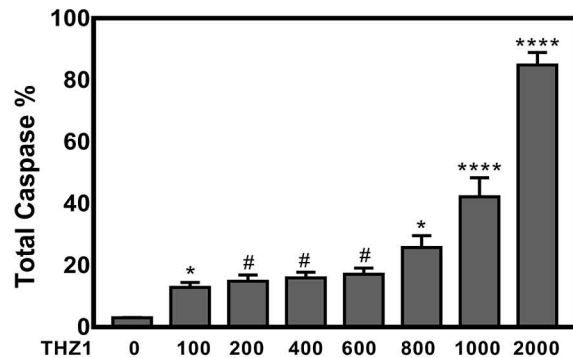

**C**

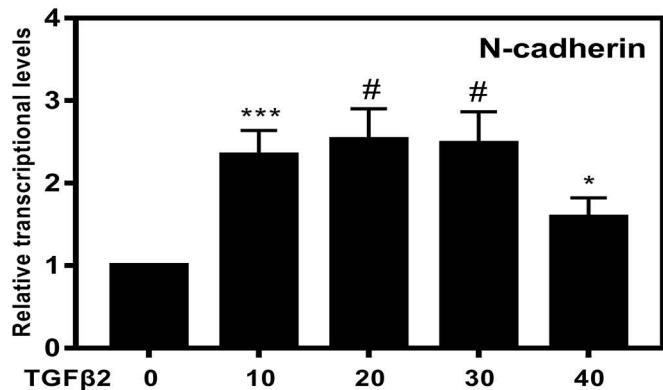

**Figure S3: EMT inhibited by THZ1 in Hela 229.**

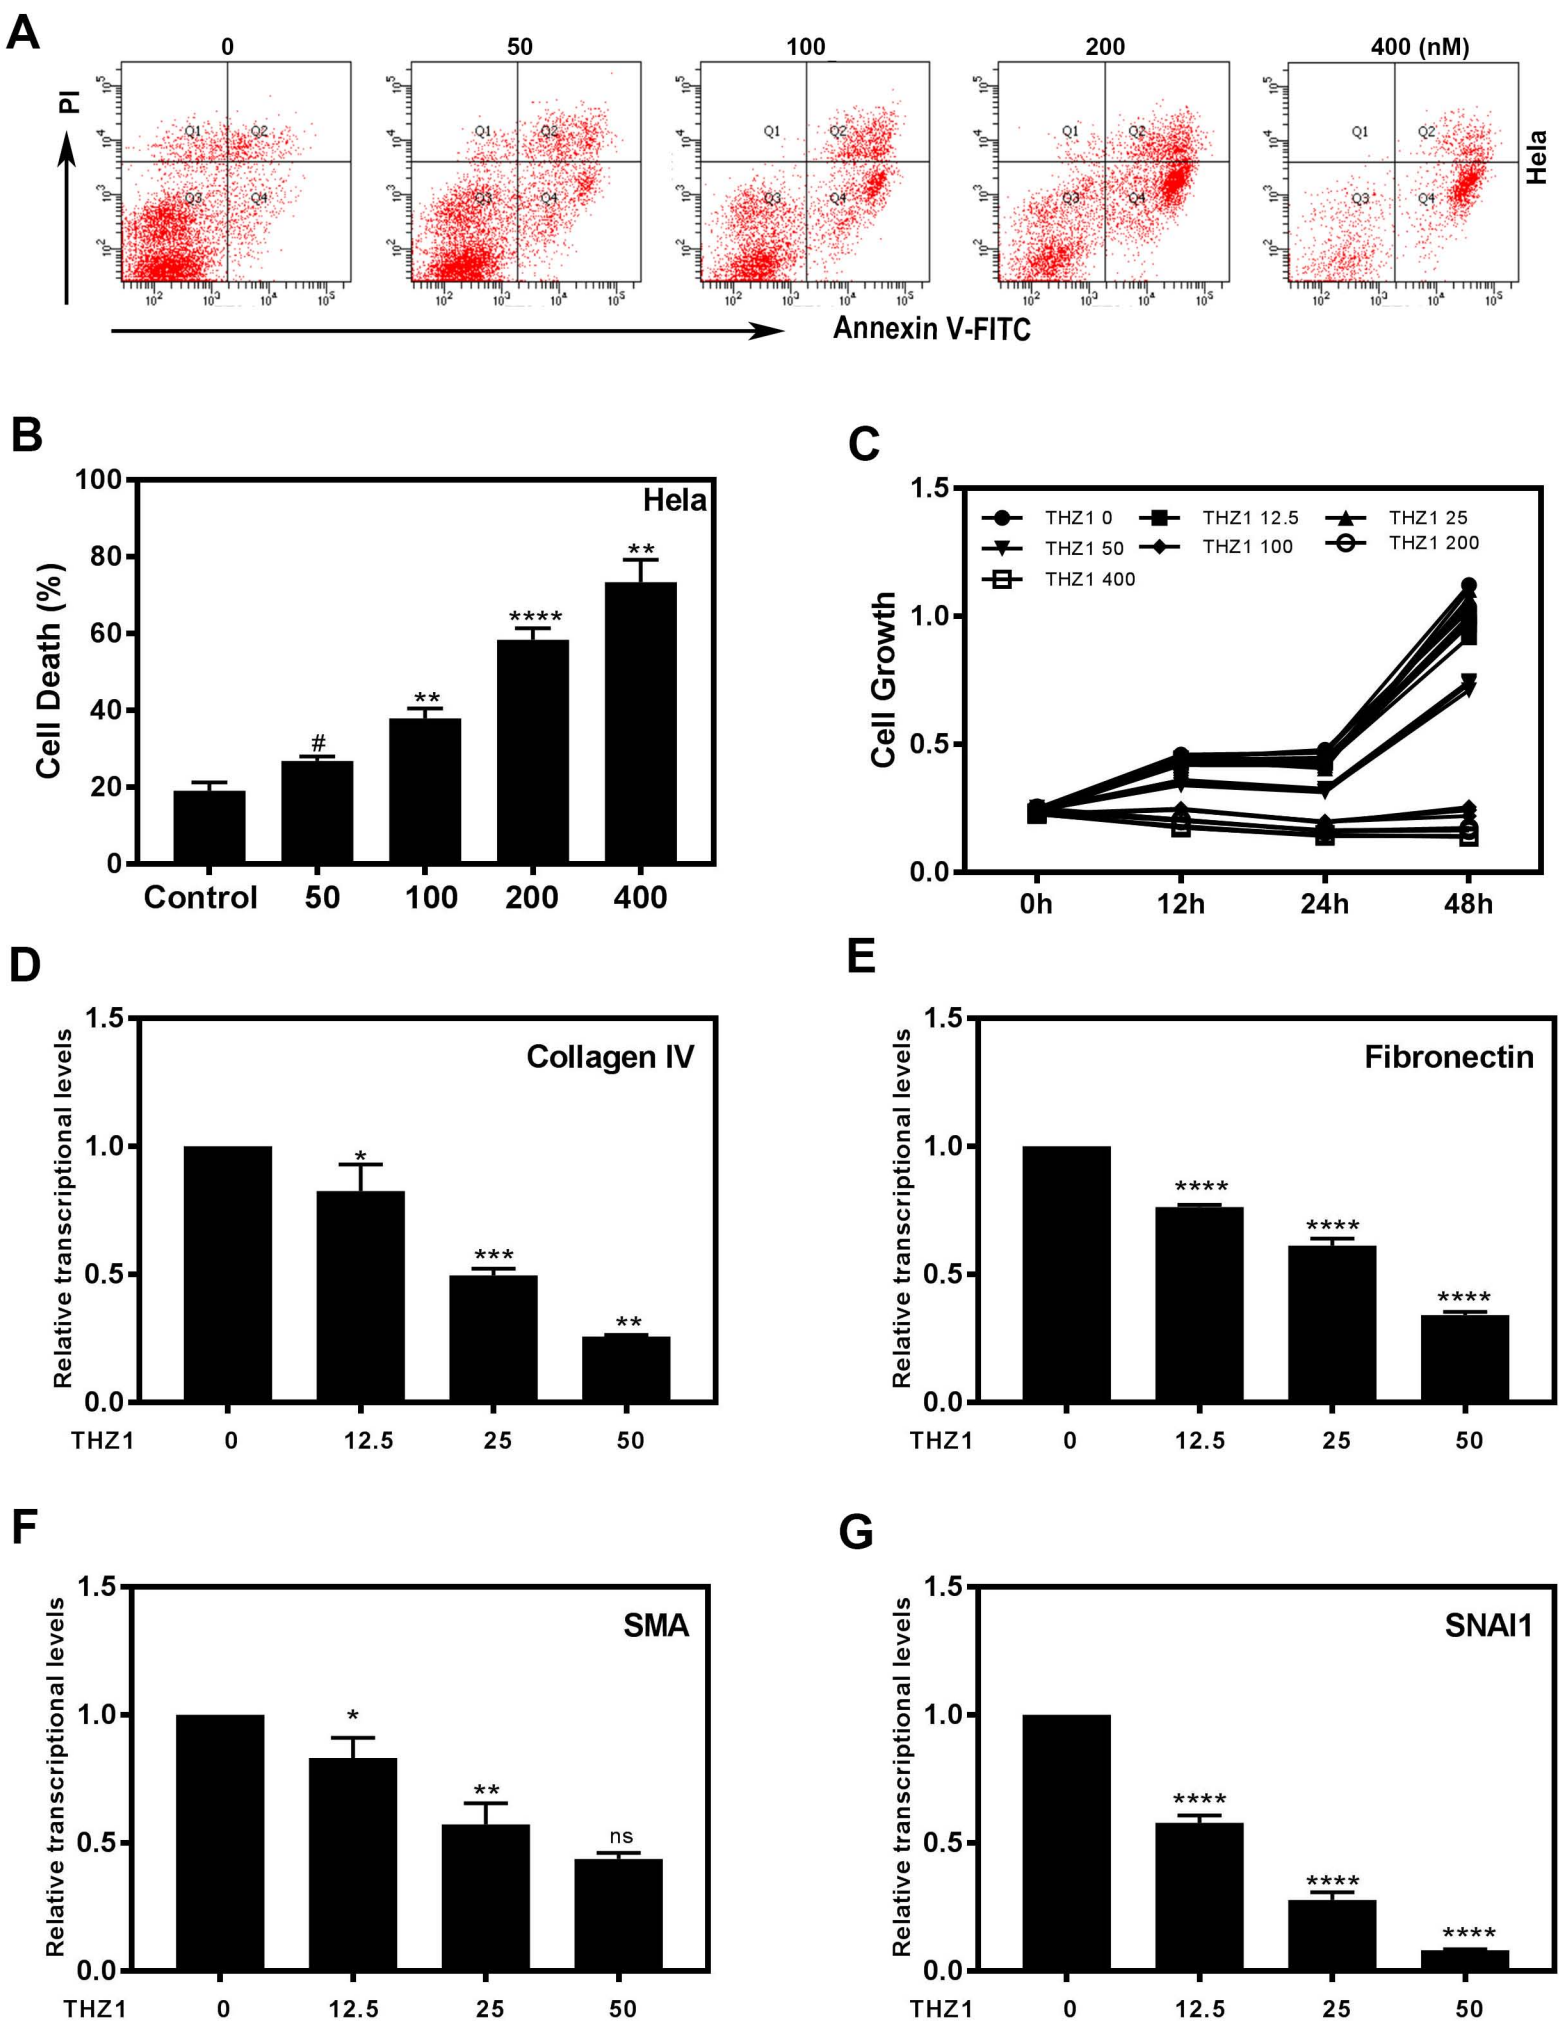

## Supplementary Figure S4 : Change of cell morphology

**A**

Control

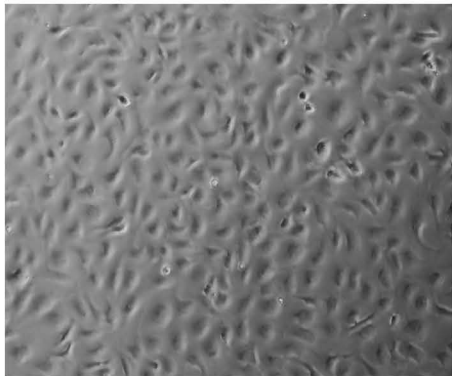

TGF $\beta$ 2

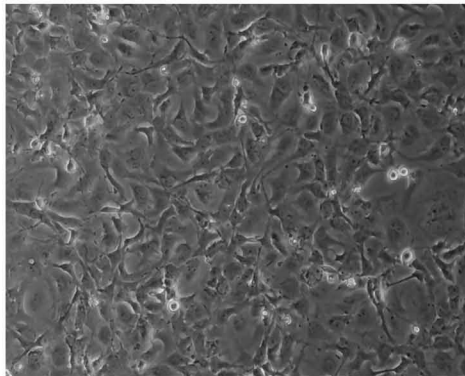

TGF $\beta$ 2 + THZ1

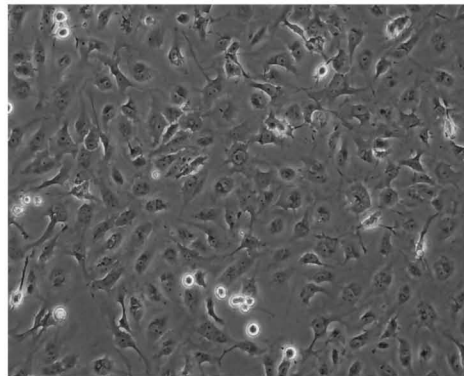

Supplement: jcav10p3778s1.pdf [file jcav10p3778s1.pdf]
